# Supplementary material
Source: Springer Nature journal article supplement (https://www.springermedizin.de/resource/supplementary/12879_2012_2261_MOESM1_ESM.pdf/9443388)
Supplement: MOESM1 [file 9443388]

Parents of children under 5 years of age who have approached the surgery and requested an appointment are identified by reception staff or nurse and given information about the study and asked to indicate if they would like to see the RN/CSO before they see the clinician

Parent & child see RN/CSO who

- Answers questions about the study
- Assesses eligibility
- Takes consent
- Collects basic information
- Explains to parents how to get urine sample

Parent & child see Doctor/Nurse who

- Answers questions about the study
- Assesses eligibility
- Records diagnostic & examination information

Parent & child see Doctor/Nurse who

- Records diagnostic & examination information

Parent & child see RN/CSO who

- Takes consent
- Collects basic information
- Explains to parents how to get a urine sample

Urine sample provided to RN/CSO (either during visit or done at home and returned to the surgery). Parent receives voucher from RN/CSO as a 'Thank You' token. Urine sample tested with dipstick by RN/CSO, result passed to clinician and recorded on CRF/website.

Management due to local clinical practice

12-21 day follow-up by telephone (for those  $>10^5$ CFU ml and a sample  $<10^5$  CFU ml using proportional selection rules in Table 2) A second voucher is posted to the parent from the study centre as a 'Thank You' token for taking part in the interview.

3 month medical notes review (for those  $>10^5$ CFU ml and a sample  $>10^5$ CFU ml using proportional selection rules in Table 2)

--> Indicates that the parents can choose to participate either before or after the child sees the doctor/nurse.
